# Supplementary material for: Novel mutations identified from whole-genome sequencing of SARS-CoV-2 isolated from Noakhali, Bangladesh
Source: Research Square preprint supplement (doi:10.21203/rs.3.rs-437228/v1), 2021-04-30
Supplement: Supplementary file 1 [file 04162ff7766c44b98a64780c.xlsx]

## Sheet: Sheet1
Supplementary Table S3: Lineages of SARS-CoV-2 genomes isolated from Noakhali, Bangladesh.
Sequence name	Lineage	Probability	Most common countries	Number of Taxa	Date range
NGRI-R1-NSTU-2	B.1.36	1	UK, India, Denmark	844	March-15, November-16
NGRI-R1-NSTU-3	B.1.1.25	1	Bangladesh, UK, Australia	151	April-17, October-12
NGRI-R1-NSTU-5	B.1.36	1	UK, India, Denmark	844	March-15, November-16
NGRI-R1-NSTU-6	B.1.1.277	1	UK, Denmark, Norway	334	March-17, November-07
NGRI-R1-NSTU-16	B.1.1	1	UK, USA, Russia	9199	February-20, November-12
NGRI-R1-NSTU-18	B.1.1.25	1	Bangladesh, UK, Australia	151	April-17, October-12
NGRI-R1-NSTU-21	B.1.36.16	1	UK, Bangladesh, Singapore	80	May-03, November-11
NGRI-R1-NSTU-31	B.1.36.16	1	UK, Bangladesh, Singapore	80	May-03, November-11
NGRI-R2-1	B.1.36.16	1	UK, Bangladesh, Singapore	80	May-03, November-11
NGRI-R2-4	B.1.1	1	UK, USA, Russia	9199	February-20, November-12
NGRI-R2-8	B.1.1.25	1	Bangladesh, UK, Australia	151	April-17, October-12
NGRI-R2-11	B.1.1	1	UK, USA, Russia	9199	February-20, November-12
NGRI-R2-17	B.1.1.10	1	UK, USA, Switzerland	450	March-05, September-12
NGRI-R2-18	B.1.36.16	1	UK, Bangladesh, Singapore	80	May-03, November-11
NGRI-R2-20	B.1.1	1	UK, USA, Russia	9199	February-20, November-12
NGRI-R2-22	B.1.1	1	UK, USA, Russia	9199	February-20, November-12
NGRI-R2-24	B.1.36.16	1	UK, Bangladesh, Singapore	80	May-03, November-11
NGRI-R2-25	B.1.36.16	1	UK, Bangladesh, Singapore	80	May-03, November-11
NGRI-R2-26	B.1.1.25	1	Bangladesh, UK, Australia	151	April-17, October-12
NGRI-R2-27	B.1.1	1	UK, USA, Russia	9199	February-20, November-12
NGRI-R2-O7	B.1.1	1	UK, USA, Russia	9199	February-20, November-12
NGRI-R2-O9	B.1.36.16	1	UK, Bangladesh, Singapore	80	May-03, November-11
NGRI-R2-O10	B.1.1.25	1	Bangladesh, UK, Australia	151	April-17, October-12
NGRI-R2-O25	B.1.1	1	UK, USA, Russia	9199	February-20, November-12
NGRI-R3-2	B.1.36	1	UK, India, Denmark	844	March-15, November-16
NGRI-R3-3	B.1.36	1	UK, India, Denmark	844	March-15, November-16
NGRI-R3-5	B.1.1.25	1	Bangladesh, UK, Australia	151	April-17, October-12
NGRI-R3-6	B.1.1	1	UK, USA, Russia	9199	February-20, November-12
NGRI-R3-7	B.1.1	1	UK, USA, Russia	9199	February-20, November-12
NGRI-R3-9	B.1.36.16	1	UK, Bangladesh, Singapore	80	May-03, November-11
NGRI-R3-10	B.1.1.10	1	UK, USA, Switzerland	450	March-05, September-12
NGRI-R3-11	B.1.1.10	1	UK, USA, Switzerland	450	March-05, September-12
NGRI-R3-12	B.1.1.25	1	Bangladesh, UK, Australia	151	April-17, October-12
NGRI-R3-14	B.1.1	1	UK, USA, Russia	9199	February-20, November-12
NGRI-R3-15	B.1.1	1	UK, USA, Russia	9199	February-20, November-12
NGRI-R3-16	B.1.36	1	UK, India, Denmark	844	March-15, November-16
NGRI-R3-17	B.1.36.16	1	UK, Bangladesh, Singapore	80	May-03, November-11
NGRI-R3-O1	B.1.36	1	UK, India, Denmark	844	March-15, November-16
NGRI-R3-O5	B.1.1	1	UK, USA, Russia	9199	February-20, November-12
NGRI-R3-O6	B.1.1	1	UK, USA, Russia	9199	February-20, November-12
NGRI-R3-O11	B.1.1	1	UK, USA, Russia	9199	February-20, November-12
NGRI-R3-O15	B.1.1.25	1	Bangladesh, UK, Australia	151	April-17, October-12
NGRI-R4-1	B.1.36	1	UK, India, Denmark	844	March-15, November-16
NGRI-R4-2	B.1.186	1	Saudi_Arabia, India, Australia	23	March-16, July-18
NGRI-R4-3	B.1.1.141	1	UK, Russia, Switzerland	121	May-03, October-24
NGRI-R4-6	B.1.36.16	1	UK, Bangladesh, Singapore	80	May-03, November-11
NGRI-R4-O17	B.1.1	1	UK, USA, Russia	9199	February-20, November-12
NGRI-R4-O24	B.1.1	1	UK, USA, Russia	9199	February-20, November-12
NGRI-R4-O27	B.1.1	1	UK, USA, Russia	9199	February-20, November-12
NGRI-R4-OR18	B.1.36	1	UK, India, Denmark	844	March-15, November-16
NGRI-R4-OR19	B.1.36.16	1	UK, Bangladesh, Singapore	80	May-03, November-11
NGRI-R4-OR20	B.1.1	1	UK, USA, Russia	9199	February-20, November-12
NGRI-R4-OR21	B.1.36.16	1	UK, Bangladesh, Singapore	80	May-03, November-11
NGRI-R4-OR22	B.1.36	1	UK, India, Denmark	844	March-15, November-16
NGRI-R4-OR23	B.1.1	1	UK, USA, Russia	9199	February-20, November-12
NGRI-R4-OR24	B.1.1	1	UK, USA, Russia	9199	February-20, November-12
