# Supplementary material for: Novel mutations identified from whole-genome sequencing of SARS-CoV-2 isolated from Noakhali, Bangladesh
Source: Research Square preprint supplement (doi:10.21203/rs.3.rs-437228/v1), 2021-04-30
Supplement: Supplementary file 5 [file df0550e11fedbf19ee71cae4.xlsx]

## Sheet: Sheet1
			Supplementary Table S1. Metadata of SARS-CoV-2 strains submitted to GISAID.
Virus name	Accession ID	Collection date	Location	Host	Additional location information	Sampling strategy	Gender	Patient age	Patient status	Last vaccinated	Passage	Specimen	Additional host information	Lineage	Clade	AA Substitutions
hCoV-19/Bangladesh/NGRI-R2-11/2020	EPI_ISL_1626483	2020-07-26	Asia / Bangladesh / Chittagong / Noakhali	Human			Male	30	Hospitalized		Original			B.1.1.25	GR	(NSP6_K8N,N_R203K,NSP3_P1103S,N_G204R,NSP3_V325F,NSP2_I120F,NSP12_P323L,Spike_D614G,NSP3_S148F)
hCoV-19/Bangladesh/NGRI-R2-17/2020	EPI_ISL_1626484	2020-07-25	Asia / Bangladesh / Chittagong / Noakhali	Human			Male	70	Deceased		Original			B.1.1.25	GR	(NS7b_C41S,N_R203K,N_G204R,M_H125Y,NSP2_I120F,NSP12_P323L,Spike_D614G,NSP3_S1424F)
hCoV-19/Bangladesh/NGRI-R2-18/2020	EPI_ISL_1626485	2020-07-26	Asia / Bangladesh / Chittagong / Noakhali	Human			Female	20	Live		Original			B.1.36.16	GH	(Spike_S46L,NSP3_P74L,NS3_S166L,N_S194L,NS3_Q57H,NSP14_L493F,NSP3_L1870F,NSP12_P323L,NSP2_S263F,Spike_D614G)
hCoV-19/Bangladesh/NGRI-R2-20/2020	EPI_ISL_1626486	2020-07-15	Asia / Bangladesh / Chittagong / Noakhali	Human			Male	24	Live		Original			B.1.1.25	GR	(NSP2_L462F,N_R203K,N_G204R,NSP2_I120F,NSP12_P323L,Spike_D614G,NSP6_L37F)
hCoV-19/Bangladesh/NGRI-R2-22/2020	EPI_ISL_1626487	2020-07-19	Asia / Bangladesh / Chittagong / Noakhali	Human			Male	4	Live		Original			B.1.1.25	GR	(N_G238C,N_R203K,N_G204R,NSP2_I120F,NSP12_P323L,Spike_D614G)
hCoV-19/Bangladesh/NGRI-R2-24/2020	EPI_ISL_1626488	2020-09-10	Asia / Bangladesh / Chittagong / Noakhali	Human			Female	31	Live		Original			B.1.36.16	GH	(N_S194L,NS3_Q57H,NSP12_P323L,Spike_D614G)
hCoV-19/Bangladesh/NGRI-R2-25/2020	EPI_ISL_1626489	2020-07-20	Asia / Bangladesh / Chittagong / Noakhali	Human			Male	21	Live		Original			B.1.36.16	GH	(NSP2_L451F,NSP13_P238S,N_S194L,NSP8_P10S,NS3_Q57H,NSP12_P323L,NSP3_A256V,Spike_D614G)
hCoV-19/Bangladesh/NGRI-R2-26/2020	EPI_ISL_1626490	2020-09-09	Asia / Bangladesh / Chittagong / Noakhali	Human			Female	30	Live		Original			B.1.1.25	GR	(NSP3_S794L,NSP2_A510V,N_R203K,NSP6_I199V,N_G204R,NSP13_A296S,NSP2_I120F,NS6_R20S,NSP12_P323L,Spike_D614G,NSP14_A281S)
hCoV-19/Bangladesh/NGRI-R2-27/2020	EPI_ISL_1626491	2020-07-09	Asia / Bangladesh / Chittagong / Noakhali	Human			Male	58	Live		Original			B.1.1.25	GR	(NS7a_E92stop,NSP14_A323S,N_R203K,N_G204R,NSP2_I120F,NSP12_P323L,Spike_D614G)
hCoV-19/Bangladesh/NGRI-R2-4/2020	EPI_ISL_1626492	2020-07-28	Asia / Bangladesh / Chittagong / Noakhali	Human			Male	34	Hospitalized		Original			B.1.1.25	GR	(Spike_H245Y,NS7a_V82del,NS3_N119Y,N_R203K,NS7a_S81del,NSP4_I91V,N_G204R,NSP2_I120F,NSP12_P323L,Spike_D614G)
hCoV-19/Bangladesh/NGRI-R2-O25/2020	EPI_ISL_1626493	2020-09-10	Asia / Bangladesh / Chittagong / Noakhali	Human			Male	15	Live		Original			D.2	GR	(NSP2_Q427R,N_R203K,NSP5_P132S,N_G204R,NSP14_V263I,NSP12_F77L,NSP2_I120F,NSP12_P323L,Spike_D614G)
hCoV-19/Bangladesh/NGRI-R2-O7/2020	EPI_ISL_1626494	2020-08-11	Asia / Bangladesh / Chittagong / Noakhali	Human			Female	18	Live		Original			B.1.1.25	GR	(NSP3_T1465I,N_R203K,N_G204R,NSP2_I120F,NSP12_P323L,Spike_D614G)
hCoV-19/Bangladesh/NGRI-R2-O9/2020	EPI_ISL_1626495	2020-08-11	Asia / Bangladesh / Chittagong / Noakhali	Human			Female	26	Live		Original			B.1.36.16	GH	(N_R203S,NSP10_D82N,NSP2_T332I,N_S194L,NS3_Q57H,E_L19F,NSP4_K165N,NSP12_P323L,Spike_A262S,Spike_D614G)
hCoV-19/Bangladesh/NGRI-R3-10/2020	EPI_ISL_1626496	2020-07-18	Asia / Bangladesh / Chittagong / Noakhali	Human			Male	52	Live		Original			B.1.1.25	GR	(N_R203K,NSP2_G438V,N_G204R,NSP2_I120F,NSP12_P323L,Spike_D614G,N_A211T)
hCoV-19/Bangladesh/NGRI-R3-11/2020	EPI_ISL_1626497	2020-07-18	Asia / Bangladesh / Chittagong / Noakhali	Human			Female	52	Hospitalized		Original			B.1.1.25	GR	(N_R203K,N_G204R,NSP2_I120F,NSP12_P323L,Spike_D614G,N_A211T)
hCoV-19/Bangladesh/NGRI-R3-12/2020	EPI_ISL_1626498	2020-07-18	Asia / Bangladesh / Chittagong / Noakhali	Human			Male	31	Live		Original			B.1.1.25	GR	(Spike_E654V,N_R203K,N_G204R,NSP2_I120F,NSP8_A27T,NSP12_P323L,Spike_D614G,Spike_A684S)
hCoV-19/Bangladesh/NGRI-R3-14/2020	EPI_ISL_1626499	2020-10-23	Asia / Bangladesh / Chittagong / Noakhali	Human			Male	69	Live		Original			B.1.1.25	GR	(Spike_C1247S,N_R203K,N_G204R,NSP2_I120F,NSP12_P323L,Spike_D614G)
hCoV-19/Bangladesh/NGRI-R3-15/2020	EPI_ISL_1626500	2020-10-24	Asia / Bangladesh / Chittagong / Noakhali	Human			Male	30	Live		Original			B.1.1.25	GR	(Spike_C1247S,N_R203K,N_G204R,NSP2_I120F,NSP12_P323L,Spike_D614G)
hCoV-19/Bangladesh/NGRI-R3-16/2020	EPI_ISL_1626501	2020-10-25	Asia / Bangladesh / Chittagong / Noakhali	Human			Male	unknown	Live		Original			B.1.36.8	GH	(N_S194L,NS3_Q57H,Spike_Y204F,NSP12_P323L,Spike_D614G,NSP2_S122F)
hCoV-19/Bangladesh/NGRI-R3-17/2020	EPI_ISL_1626502	2020-10-26	Asia / Bangladesh / Chittagong / Noakhali	Human			Male	22	Hospitalized		Original			B.1.36.16	GH	(NSP3_P74L,N_M210I,N_S194L,NSP2_R370C,NS3_Q57H,NSP12_P323L,NSP2_S263F,Spike_D614G,NSP3_L1259R)
hCoV-19/Bangladesh/NGRI-R3-2/2020	EPI_ISL_1626503	2020-07-19	Asia / Bangladesh / Chittagong / Noakhali	Human			Female	34	Hospitalized		Original			B.1.36.8	GH	(Spike_K1191N,NS3_L52F,N_S194L,NS3_Q57H,NSP8_Q73H,NSP12_P323L,NSP6_R5G,Spike_D614G,NSP3_L373M)
hCoV-19/Bangladesh/NGRI-R3-3/2020	EPI_ISL_1626504	2020-07-19	Asia / Bangladesh / Chittagong / Noakhali	Human			Female	18	Live		Original			B.1.36.8	GH	(Spike_K1191N,NS3_L52F,N_S194L,NS3_Q57H,NSP8_Q73H,NSP12_P323L,NSP6_R5G,Spike_D614G,NSP3_L373M)
hCoV-19/Bangladesh/NGRI-R3-5/2020	EPI_ISL_1626505	2020-07-19	Asia / Bangladesh / Chittagong / Noakhali	Human			Female	40	Live		Original			B.1.1.25	GR	(NSP6_K8N,N_R203K,NSP12_K91R,NSP3_P1103S,N_G204R,NSP2_I120F,NSP12_P323L,Spike_D614G,NSP6_V213F,NSP3_S148F)
hCoV-19/Bangladesh/NGRI-R3-6/2020	EPI_ISL_1626506	2020-07-19	Asia / Bangladesh / Chittagong / Noakhali	Human			Female	35	Live		Original			B.1.1.25	GR	(NSP6_K8N,N_R203K,NSP3_P1103S,N_G204R,NSP2_I120F,NSP12_P323L,Spike_D614G,NSP3_S148F)
hCoV-19/Bangladesh/NGRI-R3-7/2020	EPI_ISL_1626507	2020-07-19	Asia / Bangladesh / Chittagong / Noakhali	Human			Female	40	Live		Original			B.1.1.25	GR	(NSP6_K8N,N_R203K,NSP3_P1103S,N_G204R,NSP2_I120F,NSP12_P323L,Spike_D614G,NSP3_S148F)
hCoV-19/Bangladesh/NGRI-R3-9/2020	EPI_ISL_1626508	2020-07-18	Asia / Bangladesh / Chittagong / Noakhali	Human			Male	35	Live		Original			B.1.36.16	GH	(N_S194L,NS3_Q57H,NSP12_P323L,Spike_D614G)
hCoV-19/Bangladesh/NGRI-R3-O1/2020	EPI_ISL_1626509	2020-08-11	Asia / Bangladesh / Chittagong / Noakhali	Human			Male	34	Live		Original			B.1.36.8	GH	(NSP3_K1943N,N_S194L,NS3_Q57H,NSP13_V348L,NSP12_P323L,Spike_D614G,NSP13_R248K,NSP13_L526F,Spike_D80Y)
hCoV-19/Bangladesh/NGRI-R3-O11/2020	EPI_ISL_1626510	2020-08-13	Asia / Bangladesh / Chittagong / Noakhali	Human			Male	20	Hospitalized		Original			B.1.1.25	GR	(NS7b_C12Y,N_R203K,N_G204R,NSP2_I120F,NSP12_P323L,Spike_D614G,NSP6_L37F,NSP3_A534V)
hCoV-19/Bangladesh/NGRI-R3-O15/2020	EPI_ISL_1626511	2020-08-12	Asia / Bangladesh / Chittagong / Noakhali	Human			Male	30	Live		Original			B.1.1.25	GR	(N_R203K,N_G204R,NSP2_I120F,NSP12_P323L,Spike_D614G,Spike_S1252F,NSP3_E595V)
hCoV-19/Bangladesh/NGRI-R3-O5/2020	EPI_ISL_1626512	2020-08-12	Asia / Bangladesh / Chittagong / Noakhali	Human			Male	38	Live		Original			B.1.1.25	GR	(NSP2_S369F,NSP2_T434I,N_R203K,N_G204R,NSP2_I120F,NSP12_P323L,Spike_D614G,NSP5_I78V,NSP3_D1481H,Spike_C1247F,NSP3_A534V)
hCoV-19/Bangladesh/NGRI-R3-O6/2020	EPI_ISL_1626513	2020-08-11	Asia / Bangladesh / Chittagong / Noakhali	Human			Male	58	Live		Original			B.1.1.25	GR	(NSP3_T1465I,N_R203K,N_G204R,NSP2_I120F,NSP12_P323L,Spike_D614G)
hCoV-19/Bangladesh/NGRI-R4-1/2020	EPI_ISL_1626514	2020-11-15	Asia / Bangladesh / Chittagong / Noakhali	Human			Male	39	Live		Original			B.1.36.8	GH	(NSP2_R107S,N_S194L,NSP3_V477F,NS3_Q57H,NSP3_A991V,NSP12_P323L,Spike_D614G)
hCoV-19/Bangladesh/NGRI-R4-2/2020	EPI_ISL_1626515	2020-11-16	Asia / Bangladesh / Chittagong / Noakhali	Human			Female	35	Live		Original			B.1	GH	(N_S194L,NS3_Q57H,NSP3_Q974H,NSP3_S1197I,Spike_D614G)
hCoV-19/Bangladesh/NGRI-R4-3/2020	EPI_ISL_1626516	2020-11-19	Asia / Bangladesh / Chittagong / Noakhali	Human			Female	55	Live		Original			B.1.1.25	GR	(N_R203K,N_G204R,NSP2_I120F,NSP12_P323L,Spike_D614G)
hCoV-19/Bangladesh/NGRI-R4-6/2020	EPI_ISL_1626517	2020-11-16	Asia / Bangladesh / Chittagong / Noakhali	Human			Male	47	Live		Original			B.1.36.16	GH	(N_S194L,NS3_Q57H,NSP1_E37D,NSP12_P323L,Spike_D614G)
hCoV-19/Bangladesh/NGRI-R4-O17/2020	EPI_ISL_1626518	2020-08-12	Asia / Bangladesh / Chittagong / Noakhali	Human			Male	36	Live		Original			B.1.1.25	GR	(M_D209Y,Spike_R21K,Spike_Q1201H,N_R203K,N_G204R,NSP2_I120F,NSP12_P323L,Spike_D614G,NSP6_V149F)
hCoV-19/Bangladesh/NGRI-R4-O24/2020	EPI_ISL_1626519	2020-09-10	Asia / Bangladesh / Chittagong / Noakhali	Human			Female	31	Live		Original			B.1.1.25	GR	(NSP15_R206S,NSP14_H26Y,N_R203K,N_G204R,NSP1_L92F,NSP3_V325F,NSP2_I120F,NSP12_P323L,Spike_D614G,NSP2_A360V,NS3_S171L)
hCoV-19/Bangladesh/NGRI-R4-O27/2020	EPI_ISL_1626520	2020-07-18	Asia / Bangladesh / Chittagong / Noakhali	Human			Male	70	Deceased		Original			D.2	GR	(NSP2_Q427R,N_R203K,N_G204R,NSP14_V263I,NSP2_I120F,Spike_D614G)
hCoV-19/Bangladesh/NGRI-R4-OR18/2020	EPI_ISL_1626521	2020-10-27	Asia / Bangladesh / Chittagong / Noakhali	Human			Male	unknown	Hospitalized		Original			B.1.36.8	GH	(N_S194L,NS3_Q57H,Spike_Y204F,NSP12_P323L,Spike_D614G,NSP2_S122F)
hCoV-19/Bangladesh/NGRI-R4-OR19/2020	EPI_ISL_1626522	2020-10-28	Asia / Bangladesh / Chittagong / Noakhali	Human			Male	unknown	Live		Original			B.1.36.16	GH	(N_D377Y,NSP3_S126P,N_S194L,NSP12_A581V,NS3_Q57H,NSP3_L1035F,NSP12_P323L,Spike_D614G,Spike_L54F)
hCoV-19/Bangladesh/NGRI-R4-OR20/2020	EPI_ISL_1626523	2020-10-29	Asia / Bangladesh / Chittagong / Noakhali	Human			Male	32	Hospitalized		Original			B.1.1.25	GR	(NS3_Q17R,NSP13_S259L,N_R203K,N_G204R,NSP2_I120F,NSP12_P323L,NSP5_K90R,Spike_D614G)
hCoV-19/Bangladesh/NGRI-R4-OR21/2020	EPI_ISL_1626524	2020-10-30	Asia / Bangladesh / Chittagong / Noakhali	Human			Male	32	Live		Original			B.1.36.16	GH	(NSP3_R1345C,NSP3_P74L,NSP12_T806I,N_S194L,NSP5_A129V,NS3_G187S,NSP3_V369I,NS3_Q57H,NSP12_P323L,NSP2_S263F,Spike_D614G,NSP2_A26T)
hCoV-19/Bangladesh/NGRI-R4-OR22/2020	EPI_ISL_1626525	2020-10-31	Asia / Bangladesh / Chittagong / Noakhali	Human			Male	33	Hospitalized		Original			B.1.36.8	GH	(NS7a_P84T,NSP14_M315I,N_S194L,NS3_Q57H,NSP5_A7T,Spike_D614G)
hCoV-19/Bangladesh/NGRI-R4-OR23/2020	EPI_ISL_1626526	2020-11-01	Asia / Bangladesh / Chittagong / Noakhali	Human			Male	35	Hospitalized		Original			B.1.1.25	GR	(NSP14_R163C,NSP16_V78I,N_R203K,N_G204R,NSP2_I120F,NSP12_P323L,Spike_D614G,NSP3_A264T)
hCoV-19/Bangladesh/NGRI-R4-OR24/2020	EPI_ISL_1626527	2020-11-02	Asia / Bangladesh / Chittagong / Noakhali	Human			Male	27	Hospitalized		Original			B.1.1.25	GR	(N_R203K,N_G204R,NSP2_I120F,NSP2_W450C,NSP12_P323L,Spike_D614G)
hCoV-19/Bangladesh/NGRI-NSTU-02/2020	EPI_ISL_514434	2020-07-22	Asia / Bangladesh / Chittagong / Noakhali / Companiganj Upazila	Human			Male	30	Live		Original	Nasopharyngeal and oropharyngeal swab		B.1.36.8	GH	(Spike_G769V,NSP2_A476V,N_S194L,NS3_Q57H,N_G18C,NS6_W27L,NSP12_P323L,Spike_D614G,NSP3_L373M)
hCoV-19/Bangladesh/NGRI-NSTU-03/2020	EPI_ISL_514440	2020-07-22	Asia / Bangladesh / Chittagong / Noakhali / Companigonj	Human			Male	38	Live		Original	Nasopharyngeal and oropharyngeal swab		B.1.1.25	GR	(N_R203K,NSP5_P132S,N_G204R,N_P67L,NSP2_I120F,NSP12_P323L,Spike_D614G,NSP14_S255I)
hCoV-19/Bangladesh/NGRI-NSTU-05/2020	EPI_ISL_514441	2020-07-23	Asia / Bangladesh / Chittagong / Noakhali / Begumganj	Human			Male	41	Live		Original	Nasopharyngeal and oropharyngeal swab		B.1.36.8	GH	(NSP10_V97A,N_S194L,NS3_Q57H,NSP12_P323L,Spike_D614G,NSP3_L373M)
hCoV-19/Bangladesh/NGRI-NSTU-06/2020	EPI_ISL_514442	2020-07-23	Asia / Bangladesh / Chittagong / Noakhali / Begumganj	Human			Male	50	Live		Original	Nasopharyngeal and oropharyngeal swab		B.1	G	(NSP3_K1077N,NSP12_T870I,NSP2_I120F,NSP3_T64I,NSP12_P323L,Spike_D614G)
hCoV-19/Bangladesh/NGRI-NSTU-16/2020	EPI_ISL_514580	2020-07-21	Asia / Bangladesh / Chittagong / Noakhali / Kabirhat	Human			Male	33	Live		Original			B.1.1.25	GR	(N_R203K,N_G204R,NSP2_I120F,NSP12_P323L,NSP5_K90R,Spike_D614G)
hCoV-19/Bangladesh/NGRI-NSTU-18/2020	EPI_ISL_514613	2020-07-21	Asia / Bangladesh / Chittagong / Noakhali / Kabirhat	Human			Male	51	Live		Original	Nasopharyngeal and oropharyngeal swab		B.1.1.25	GR	(N_R203K,NSP5_P132S,N_G204R,NSP2_I120F,NSP12_P323L,Spike_D614G,NSP14_S255I)
hCoV-19/Bangladesh/NGRI-NSTU-31/2020	EPI_ISL_514614	2020-07-21	Asia / Bangladesh / Chittagong / Noakhali / Kabirhat	Human			Male	73	Live		Original	Nasopharyngeal and oropharyngeal swab		B.1.36.16	GH	(NS3_S166L,N_S194L,NS3_Q57H,NSP12_P323L,Spike_D614G)
hCoV-19/Bangladesh/NGRI-R2-1/2020	EPI_ISL_1595918	2020-09-26	Asia / Bangladesh / Noakhali	Human			Male	45	Live		Original			B.1.36.16	GH	(NSP3_L1754I,N_S194L,NS3_Q57H,NSP12_P323L,Spike_D614G)
hCoV-19/Bangladesh/NGRI-NSTU-21/2020	EPI_ISL_514615	2020-07-20	Asia / Bangladesh / Chittagong / Lakshmipur / Lakshmipur	Human			Male	24	Live		Original	Nasopharyngeal and oropharyngeal swab		B.1.36.16	GH	(N_S194L,NSP3_T942I,NS3_Q57H,NSP2_T429I,NSP3_I310V,NSP12_P323L,Spike_D614G,Spike_Q675H)
