# Supplementary material for: Novel mutations identified from whole-genome sequencing of SARS-CoV-2 isolated from Noakhali, Bangladesh
Source: Research Square preprint supplement (doi:10.21203/rs.3.rs-437228/v1), 2021-04-30
Supplement: Supplementary file 6 [file 2f11ccfec79c3812ad7312c9.xlsx]

## Sheet: Sheet1
Supplementary Table S2: Sequence matches and corresponding E-values for spike protein with unique mutation as obtained from PROVEAN.
# PROVEAN version:	1.1
Number of clusers	30
Number of supporting sequences	693
PROVEAN score	-1.297
# Sequence_ID	Cluster_ID	E-value	Bit_score
gi|213990624|gb|ACJ60703.1|	1	0	2054
gi|41323721|gb|AAS00003.1|	1	0	2048
gi|31416295|gb|AAP51227.1|	1	0	2045
gi|30023954|gb|AAP13567.1|	1	0	2042
gi|55275763|gb|AAV49720.1|	1	0	2042
gi|270309463|gb|ACZ71976.1|	1	0	2041
gi|270309303|gb|ACZ71826.1|	1	0	2041
gi|60267746|gb|AAX16192.1|	1	0	2041
gi|55275767|gb|AAV49722.1|	1	0	2041
gi|55275769|gb|AAV49723.1|	1	0	2041
gi|56554899|gb|AAV98002.1|	1	0	2041
gi|38016593|gb|AAR07630.1|	1	0	2040
gi|51475480|gb|AAU04661.1|	1	0	2040
gi|270309604|gb|ACZ72108.1|	1	0	2040
gi|270309510|gb|ACZ72020.1|	1	0	2040
gi|89474524|gb|ABD72985.1|	1	0	2040
gi|51475485|gb|AAU04664.1|	1	0	2040
gi|51475482|gb|AAU04662.1|	1	0	2040
gi|89474492|gb|ABD72972.1|	1	0	2039
gi|56554885|gb|AAV97995.1|	1	0	2039
gi|56554879|gb|AAV97992.1|	1	0	2039
gi|30173397|sp|P59594.1|SPIKE_CVHSA	1	0	2039
gi|270309760|gb|ACZ72254.1|	1	0	2038
gi|89474571|gb|ABD73001.1|	1	0	2038
gi|55275761|gb|AAV49719.1|	1	0	2038
gi|53759058|gb|AAU93319.1|	1	0	2038
gi|51475467|gb|AAU04649.1|	1	0	2038
gi|38505490|gb|AAR23250.1|	1	0	2038
gi|270309697|gb|ACZ72195.1|	1	0	2038
gi|270309272|gb|ACZ71797.1|	1	0	2038
gi|99963899|gb|ABF68955.1|	1	0	2038
gi|52546961|gb|AAU81608.1|	1	0	2038
gi|40795747|gb|AAR91586.1|	1	0	2038
gi|270309447|gb|ACZ71961.1|	1	0	2038
gi|99963903|gb|ABF68957.1|	1	0	2038
gi|89474522|gb|ABD72984.1|	1	0	2038
gi|89474486|gb|ABD72969.1|	1	0	2038
gi|89474488|gb|ABD72970.1|	1	0	2038
gi|89474504|gb|ABD72977.1|	1	0	2038
gi|50345908|gb|AAT74874.1|	1	0	2038
gi|29836496|ref|NP_828851.1|	1	0	2038
gi|56554865|gb|AAV97985.1|	1	0	2038
gi|99963905|gb|ABF68958.1|	1	0	2037
gi|99963901|gb|ABF68956.1|	1	0	2037
gi|89474509|gb|ABD72979.1|	1	0	2037
gi|31581505|gb|AAP33697.1|	1	0	2037
gi|56554891|gb|AAV97998.1|	1	0	2037
gi|51475463|gb|AAU04646.1|	1	0	2037
gi|404325828|gb|AFR58672.1|	1	0	2037
gi|285803920|gb|ADC35483.1|	1	0	2037
gi|270309588|gb|ACZ72093.1|	1	0	2037
gi|99078937|gb|ABF65836.1|	1	0	2037
gi|56554895|gb|AAV98000.1|	1	0	2037
gi|56554875|gb|AAV97990.1|	1	0	2037
gi|56554863|gb|AAV97984.1|	1	0	2037
gi|89474539|gb|ABD72988.1|	1	0	2036
gi|50365702|gb|AAT76147.1|	1	0	2036
gi|41764106|gb|AAS10463.1|	1	0	2036
gi|56554897|gb|AAV98001.1|	1	0	2036
gi|56554867|gb|AAV97986.1|	1	0	2036
gi|56462870|gb|AAV91631.1|	1	0	2036
gi|89474554|gb|ABD72995.1|	1	0	2036
gi|270309619|gb|ACZ72122.1|	1	0	2036
gi|99963907|gb|ABF68959.1|	1	0	2036
gi|326908465|gb|AEA10473.1|	1	0	2035
gi|270309479|gb|ACZ71991.1|	1	0	2035
gi|38016581|gb|AAR07624.1|	1	0	2035
gi|45738208|gb|AAS75868.1|	1	0	2035
gi|404325873|gb|AFR58714.1|	1	0	2034
gi|391377978|gb|AFM43867.1|	1	0	2034
gi|326908433|gb|AEA10443.1|	1	0	2034
gi|229595253|gb|ACQ82725.1|	1	0	2034
gi|172044020|gb|ACB69894.1|	1	0	2034
gi|40457434|gb|AAR86788.1|	1	0	2034
gi|56554873|gb|AAV97989.1|	1	0	2034
gi|38016591|gb|AAR07629.1|	1	0	2033
gi|172044008|gb|ACB69883.1|	1	0	2032
gi|92698735|dbj|BAE93401.1|	1	0	2031
gi|89474518|gb|ABD72982.1|	1	0	2031
gi|119926571|dbj|BAF42873.1|	1	0	2031
gi|38016585|gb|AAR07626.1|	1	0	2031
gi|172044032|gb|ACB69905.1|	1	0	2030
gi|38016587|gb|AAR07627.1|	1	0	2029
gi|38016589|gb|AAR07628.1|	1	0	2028
gi|38016583|gb|AAR07625.1|	1	0	2028
gi|38016595|gb|AAR07631.1|	1	0	2028
gi|32454346|gb|AAP82968.1|	1	0	2027
gi|172043983|gb|ACB69860.1|	1	0	2007
gi|292660185|gb|ADE34766.1|	1	0	2002
gi|123847331|sp|Q3LZX1.1|SPIKE_BCHK3	1	0	2001
gi|292660235|gb|ADE34812.1|	1	0	1999
gi|292660137|gb|ADE34722.1|	1	0	1999
gi|71796706|gb|AAZ41329.1|	1	0	1999
gi|292660173|gb|ADE34755.1|	1	0	1999
gi|292660247|gb|ADE34823.1|	1	0	1998
gi|255733175|gb|ACU31051.1|	1	0	1995
gi|82582259|sp|Q3I5J5.1|SPIKE_BCRP3	1	0	1986
gi|123861109|sp|Q0Q475.1|SPIKE_BC279	1	0	1974
gi|89514837|gb|ABD75332.1|	1	0	1974
gi|255733150|gb|ACU31032.1|	1	0	1972
gi|89514823|gb|ABD75323.1|	1	0	1939
gi|109893925|gb|ABG47060.1|	1	0	1937
gi|304633677|ref|YP_003858584.1|	1	0	1887
gi|53759060|gb|AAU93320.1|	2	0	1411
gi|52078109|gb|AAU25830.1|	2	0	1035
gi|92429689|gb|ABE77216.1|	2	0	1002
gi|324104002|gb|ADY17911.1|	3	0	848
gi|323371229|gb|ADX59466.1|	4	4e-180	637
gi|304435176|gb|ADM33574.1|	5	2e-178	632
gi|304435158|gb|ADM33558.1|	5	2e-178	632
gi|124389497|gb|ABN10927.1|	5	2e-178	632
gi|304435185|gb|ADM33582.1|	6	1e-177	629
gi|304435167|gb|ADM33566.1|	6	1e-177	629
gi|124389488|gb|ABN10919.1|	6	2e-175	622
gi|57791695|gb|AAW56614.1|	7	2e-174	619
gi|126030134|ref|YP_001039971.1|	8	4e-173	614
gi|124389506|gb|ABN10935.1|	9	3e-171	608
gi|126030124|ref|YP_001039962.1|	10	1e-168	600
gi|323371238|gb|ADX59474.1|	8	1e-167	596
gi|124389449|gb|ABN10884.1|	10	2e-165	589
gi|124389459|gb|ABN10893.1|	10	4e-165	588
gi|108773759|gb|ABG11962.1|	10	8e-163	580
gi|42741270|gb|AAS44781.1|	2	1e-162	579
gi|42741267|gb|AAS44779.1|	2	2e-162	579
gi|42741240|gb|AAS44761.1|	2	2e-162	579
gi|42741279|gb|AAS44787.1|	2	6e-162	577
gi|113882959|ref|YP_729203.1|	11	4e-160	571
gi|397136012|gb|AFO11507.1|	12	1e-147	530
gi|547041|gb|AAB30950.1|	12	3e-147	528
gi|397136023|gb|AFO11517.1|	12	6e-147	527
gi|138178|sp|P11225.1|SPIKE_CVMJH	12	2e-146	526
gi|5565844|gb|AAD45229.1|AF107212_1	12	1e-142	513
gi|124389409|gb|ABN10848.1|	11	1e-138	499
gi|126030114|ref|YP_001039953.1|	11	3e-138	499
gi|124389419|gb|ABN10857.1|	11	3e-138	498
gi|124389429|gb|ABN10866.1|	11	7e-137	494
gi|170675013|gb|ACB30203.1|	13	9e-136	490
gi|87082928|gb|ABD18916.1|	13	3e-135	488
gi|87082918|gb|ABD18911.1|	13	3e-135	488
gi|87082912|gb|ABD18908.1|	13	6e-135	488
gi|87082930|gb|ABD18917.1|	13	6e-135	488
gi|61105566|gb|AAX38496.1|	13	6e-135	487
gi|61105558|gb|AAX38492.1|	13	7e-135	487
gi|380750150|gb|AFE48827.1|	13	7e-135	487
gi|196174731|gb|ACG75895.1|	13	8e-135	487
gi|170675007|gb|ACB30200.1|	13	8e-135	487
gi|310769582|gb|ADP21335.1|	13	9e-135	487
gi|310769584|gb|ADP21336.1|	13	1e-134	487
gi|87082914|gb|ABD18909.1|	13	1e-134	487
gi|87082956|gb|ABD18930.1|	13	1e-134	486
gi|212571736|gb|ACJ35486.1|	13	1e-134	486
gi|87082922|gb|ABD18913.1|	13	1e-134	486
gi|145559632|gb|ABP73656.1|	13	1e-134	486
gi|87082924|gb|ABD18914.1|	13	1e-134	486
gi|61105556|gb|AAX38491.1|	13	2e-134	486
gi|253756610|ref|YP_003038522.1|	13	2e-134	486
gi|145208975|gb|ABP38313.1|	13	2e-134	486
gi|215478130|gb|ACJ66977.1|	13	2e-134	486
gi|61105552|gb|AAX38489.1|	13	2e-134	486
gi|380750139|gb|AFE48817.1|	13	2e-134	486
gi|145208910|gb|ABP38253.1|	13	2e-134	486
gi|61105562|gb|AAX38494.1|	13	2e-134	486
gi|87082964|gb|ABD18934.1|	13	2e-134	486
gi|251748080|gb|ACT10983.1|	13	2e-134	486
gi|215478144|gb|ACJ66990.1|	13	2e-134	485
gi|145208891|gb|ABP38236.1|	13	2e-134	485
gi|215478112|gb|ACJ66961.1|	13	3e-134	485
gi|215478096|gb|ACJ66946.1|	13	3e-134	485
gi|6706916|gb|AAF25499.1|AF058942_3	13	3e-134	485
gi|138171|sp|P25192.1|SPIKE_CVBLY	13	3e-134	485
gi|82012998|sp|Q9QAQ8.1|SPIKE_CVBOK	13	3e-134	485
gi|145208967|gb|ABP38306.1|	13	3e-134	485
gi|61105564|gb|AAX38495.1|	13	3e-134	485
gi|124294675|gb|ABI93999.2|	13	4e-134	485
gi|87082952|gb|ABD18928.1|	13	4e-134	485
gi|145208899|gb|ABP38243.1|	13	4e-134	484
gi|15081547|ref|NP_150077.1|	13	4e-134	484
gi|87082926|gb|ABD18915.1|	13	5e-134	484
gi|193795729|gb|ACF21935.1|	13	5e-134	484
gi|380750126|gb|AFE48805.1|	13	5e-134	484
gi|394935454|ref|YP_005454245.1|	13	5e-134	484
gi|81957133|sp|Q8V436.1|SPIKE_CVBLU	13	5e-134	484
gi|87082958|gb|ABD18931.1|	13	5e-134	484
gi|87082954|gb|ABD18929.1|	13	5e-134	484
gi|157785739|gb|ABV74054.1|	13	7e-134	484
gi|87082920|gb|ABD18912.1|	13	8e-134	484
gi|82013003|sp|Q9QAR5.1|SPIKE_CVBLS	13	9e-134	484
gi|145208938|gb|ABP38279.1|	13	9e-134	484
gi|61105554|gb|AAX38490.1|	13	9e-134	484
gi|253756585|ref|YP_003038499.1|	13	1e-133	483
gi|87082916|gb|ABD18910.1|	13	2e-133	483
gi|110746787|gb|ABG89288.1|	13	2e-133	483
gi|61105568|gb|AAX38497.1|	13	2e-133	482
gi|253756598|ref|YP_003038511.1|	13	2e-133	482
gi|87082968|gb|ABD18936.1|	13	3e-133	482
gi|138174|sp|P25194.1|SPIKE_CVBV	13	5e-133	481
gi|155369171|dbj|BAF75631.1|	13	6e-133	481
gi|359690935|emb|CCE89338.1|	13	7e-133	481
gi|359690937|emb|CCE89339.1|	13	9e-133	480
gi|193795731|gb|ACF21936.1|	13	1e-132	480
gi|359690939|emb|CCE89340.1|	13	2e-132	479
gi|138170|sp|P25191.1|SPIKE_CVBL9	13	3e-132	479
gi|475894|emb|CAA83661.1|	13	4e-132	478
gi|138172|sp|P15777.1|SPIKE_CVBM	13	6e-132	478
gi|138169|sp|P25190.1|SPIKE_CVBF	13	6e-132	477
gi|109150342|dbj|BAE96086.1|	13	9e-132	477
gi|218937674|gb|ACL12996.1|	13	1e-131	477
gi|293330427|dbj|BAJ04696.1|	14	1e-131	476
gi|170675011|gb|ACB30202.1|	13	1e-131	476
gi|170675009|gb|ACB30201.1|	13	1e-131	476
gi|110618143|gb|ABG78748.1|	13	2e-131	476
gi|475892|emb|CAA83660.1|	13	2e-131	476
gi|220961740|gb|ACL93318.1|	13	2e-131	476
gi|189406720|dbj|BAG48179.1|	13	3e-131	475
gi|225403261|gb|ACN89743.1|	14	4e-131	475
gi|87082960|gb|ABD18932.1|	13	4e-131	475
gi|87082966|gb|ABD18935.1|	13	5e-131	474
gi|220961742|gb|ACL93319.1|	13	7e-131	474
gi|1352861|sp|P25193.2|SPIKE_CVBQ	13	8e-131	474
gi|87082962|gb|ABD18933.1|	13	1e-130	473
gi|220961744|gb|ACL93320.1|	13	2e-130	472
gi|122726678|gb|ABM66810.1|	13	2e-130	472
gi|31376205|gb|AAO06124.1|	13	1e-129	470
gi|387848928|dbj|BAM15656.1|	13	1e-129	470
gi|167600358|ref|YP_001672000.1|	13	1e-129	470
gi|154814494|gb|ABS87264.1|	14	2e-129	469
gi|62528986|gb|AAX84791.1|	13	3e-129	468
gi|62530892|gb|AAX85669.1|	13	4e-129	468
gi|50844472|gb|AAT84354.1|	13	8e-129	467
gi|123867264|sp|Q0ZME7.1|SPIKE_CVHN5	15	9e-129	467
gi|89515426|gb|ABD75513.1|	15	1e-128	467
gi|38018026|ref|NP_937950.1|	13	1e-128	467
gi|89515417|gb|ABD75505.1|	15	2e-128	466
gi|316998098|dbj|BAJ52885.1|	13	2e-128	466
gi|89515543|gb|ABD75617.1|	15	2e-128	466
gi|34398255|gb|AAQ67205.1|	13	2e-128	466
gi|123862264|sp|Q14EB0.1|SPIKE_CVHN2	15	2e-128	466
gi|89515462|gb|ABD75545.1|	15	3e-128	465
gi|50844481|gb|AAT84362.1|	13	3e-128	465
gi|89515552|gb|ABD75625.1|	15	4e-128	465
gi|549302|sp|P36334.1|SPIKE_CVHOC	13	4e-128	464
gi|85718618|ref|YP_459952.1|	13	3e-127	462
gi|28916168|gb|AAO59467.1|	16	4e-127	461
gi|344332701|gb|AEN19358.1|	13	6e-127	461
gi|62528988|gb|AAX84792.1|	13	1e-126	459
gi|1352862|sp|P11224.2|SPIKE_CVMA5	16	2e-126	459
gi|40806051|gb|AAR92025.1|	16	2e-126	459
gi|225403239|gb|ACN89723.1|	16	2e-126	459
gi|9629814|ref|NP_045300.1|	16	2e-126	459
gi|62528994|gb|AAX84795.1|	13	2e-126	459
gi|82060151|sp|Q8JSP8.1|SPIKE_CVPIA	13	2e-126	459
gi|82011698|sp|Q8BB25.1|SPIKE_CVP67	13	2e-126	459
gi|465382|sp|Q02385.1|SPIKE_CVMJC	14	2e-126	459
gi|561670|gb|AAA87062.1|	14	3e-126	459
gi|60115395|ref|YP_209233.1|	14	3e-126	459
gi|344332710|gb|AEN19366.1|	13	3e-126	459
gi|225403209|gb|ACN89696.1|	14	3e-126	459
gi|225403219|gb|ACN89705.1|	14	4e-126	458
gi|7769355|gb|AAF69344.1|AF208067_5	16	4e-126	458
gi|225403237|gb|ACN89722.1|	14	4e-126	458
gi|225403283|gb|ACN89763.1|	14	4e-126	458
gi|40806053|gb|AAR92026.1|	16	5e-126	458
gi|9653289|gb|AAB27260.2|	13	1e-125	457
gi|62392|emb|CAA79896.1|	13	1e-125	456
gi|381354050|gb|AFG25750.1|	14	2e-125	456
gi|561672|gb|AAA87063.1|	14	3e-125	455
gi|81971726|sp|Q9IKD1.1|SPIKE_CVRSD	14	3e-125	455
gi|298199707|gb|ADI59790.1|	14	8e-125	454
gi|380706988|gb|AFD97607.1|	14	1e-124	453
gi|56807326|ref|YP_173238.1|	15	2e-124	452
gi|328496819|dbj|BAK18575.1|	14	2e-124	452
gi|89515534|gb|ABD75609.1|	15	2e-124	452
gi|31321946|gb|AAM55464.1|	14	3e-124	452
gi|306569687|gb|ADN03339.1|	15	3e-124	452
gi|253750535|ref|YP_003029848.1|	14	3e-124	452
gi|381354061|gb|AFG25760.1|	14	4e-124	451
gi|2662177|dbj|BAA23719.1|	14	4e-124	451
gi|89515444|gb|ABD75529.1|	15	6e-124	451
gi|57230966|gb|AAW47240.1|	14	6e-124	451
gi|89515408|gb|ABD75497.1|	15	6e-124	451
gi|89515516|gb|ABD75593.1|	15	6e-124	451
gi|89515525|gb|ABD75601.1|	15	6e-124	451
gi|40806055|gb|AAR92027.1|	16	8e-124	451
gi|89515471|gb|ABD75553.1|	15	1e-123	450
gi|7769344|gb|AAF69334.1|AF208066_5	16	1e-123	450
gi|6179903|gb|AAF05704.1|	14	2e-123	449
gi|40806057|gb|AAR92028.1|	16	2e-123	449
gi|6625763|gb|AAF19386.1|AF201929_4	14	2e-121	443
gi|169822561|ref|YP_001718612.1|	17	4e-101	375
gi|58987|emb|CAA41065.1|	18	1e-99	370
gi|99030892|gb|ABF61571.1|	18	2e-99	369
gi|371940435|dbj|BAL45640.1|	19	2e-99	369
gi|99030897|gb|ABF61575.1|	18	2e-99	369
gi|13604338|gb|AAK32191.1|	19	7e-99	367
gi|99030790|gb|ABF61481.1|	18	8e-99	367
gi|82780495|gb|ABB90527.1|	19	9e-99	367
gi|82780459|gb|ABB90509.1|	19	1e-98	367
gi|82780473|gb|ABB90516.1|	19	1e-98	367
gi|82780485|gb|ABB90522.1|	19	1e-98	367
gi|82780461|gb|ABB90510.1|	19	1e-98	367
gi|82780469|gb|ABB90514.1|	19	1e-98	367
gi|371940431|dbj|BAL45638.1|	19	1e-98	367
gi|82780499|gb|ABB90529.1|	19	1e-98	367
gi|82780471|gb|ABB90515.1|	19	1e-98	367
gi|82780455|gb|ABB90507.1|	19	2e-98	366
gi|82780479|gb|ABB90519.1|	19	2e-98	366
gi|397738951|dbj|BAM34500.1|	20	2e-98	366
gi|13604336|gb|AAK32190.1|	19	2e-98	366
gi|82780467|gb|ABB90513.1|	19	2e-98	366
gi|82780457|gb|ABB90508.1|	19	3e-98	366
gi|82780481|gb|ABB90520.1|	19	3e-98	365
gi|82780487|gb|ABB90523.1|	19	4e-98	365
gi|13604332|gb|AAK32188.1|	19	5e-98	365
gi|371940437|dbj|BAL45641.1|	19	5e-98	365
gi|82780493|gb|ABB90526.1|	19	5e-98	365
gi|82780453|gb|ABB90506.1|	19	8e-98	364
gi|13604334|gb|AAK32189.1|	19	9e-98	364
gi|12175748|ref|NP_073551.1|	19	1e-97	364
gi|371940433|dbj|BAL45639.1|	19	1e-97	363
gi|371940429|dbj|BAL45637.1|	19	2e-97	363
gi|82780497|gb|ABB90528.1|	19	3e-97	362
gi|310696857|gb|ADP06481.1|	21	3e-97	362
gi|251747951|gb|ACT10865.1|	22	3e-97	362
gi|99030902|gb|ABF61579.1|	23	4e-97	362
gi|251748030|gb|ACT10937.1|	22	4e-97	362
gi|99030832|gb|ABF61518.1|	18	4e-97	362
gi|253326718|gb|ACT31313.1|	23	6e-97	361
gi|13378217|gb|AAK18745.1|	18	6e-97	361
gi|319769052|gb|ADV71747.1|	21	7e-97	361
gi|262035641|emb|CAZ86708.1|	23	7e-97	361
gi|251747985|gb|ACT10896.1|	20	1e-96	360
gi|6425133|gb|AAF08315.1|	18	1e-96	360
gi|975637|dbj|BAA06805.1|	20	2e-96	360
gi|73810215|gb|AAZ86077.1|	22	2e-96	360
gi|385215157|gb|AFI49431.1|	19	2e-96	359
gi|213517498|gb|ACJ50191.1|	23	2e-96	359
gi|213517480|gb|ACJ50175.1|	23	3e-96	359
gi|1321872|emb|CAA60684.1|	23	3e-96	359
gi|213517462|gb|ACJ50159.1|	23	3e-96	358
gi|99030874|gb|ABF61555.1|	23	4e-96	358
gi|317452864|emb|CBA13338.1|	24	6e-96	358
gi|99030805|gb|ABF61494.1|	23	7e-96	357
gi|323371254|gb|ADX59488.1|	25	8e-96	357
gi|324963473|gb|ADY62542.1|	23	1e-95	357
gi|109657784|gb|ABG36787.1|	23	1e-95	357
gi|383081745|ref|YP_005352846.1|	26	2e-95	357
gi|51947538|gb|AAU14248.1|	23	2e-95	356
gi|386370463|gb|AFJ11176.1|	23	2e-95	356
gi|213517489|gb|ACJ50183.1|	23	2e-95	356
gi|317452867|emb|CBB12677.1|	24	2e-95	356
gi|301750577|gb|ADK88938.1|	24	3e-95	356
gi|353742751|gb|AER08735.1|	23	3e-95	355
gi|213517471|gb|ACJ50167.1|	23	3e-95	355
gi|375243663|gb|ADF47690.2|	23	4e-95	355
gi|387230695|gb|AFJ70004.1|	23	4e-95	355
gi|387230687|gb|AFJ70000.1|	23	6e-95	354
gi|343170549|gb|AEL97578.1|	23	7e-95	354
gi|261363533|gb|ACX71843.1|	23	7e-95	354
gi|197724283|gb|ACH72794.1|	23	7e-95	354
gi|349582775|gb|AEP84746.1|	23	9e-95	354
gi|213517507|gb|ACJ50199.1|	23	9e-95	354
gi|229270206|gb|ACQ55230.1|	23	1e-94	354
gi|186910080|gb|ACC94326.1|	23	1e-94	354
gi|99030814|gb|ABF61502.1|	23	1e-94	354
gi|109657793|gb|ABG36795.1|	23	1e-94	353
gi|99030883|gb|ABF61563.1|	23	1e-94	353
gi|50235232|gb|AAT70772.1|	23	1e-94	353
gi|13448694|gb|AAK27168.1|	23	1e-94	353
gi|319769093|gb|ADV71785.1|	23	1e-94	353
gi|334847645|gb|ABE68840.3|	23	1e-94	353
gi|226201155|gb|ACO37566.1|	23	1e-94	353
gi|99030796|gb|ABF61486.1|	23	1e-94	353
gi|327554713|gb|AEB00706.1|	23	2e-94	353
gi|57791734|gb|AAW56621.1|	23	2e-94	353
gi|171988298|gb|ACB59362.1|	23	2e-94	353
gi|251748007|gb|ACT10916.1|	20	2e-94	353
gi|336289869|gb|ABY66336.2|	23	2e-94	353
gi|164665747|gb|ABY66327.1|	23	2e-94	353
gi|387230685|gb|AFJ69999.1|	23	2e-94	353
gi|164665767|gb|ABY66337.1|	23	2e-94	353
gi|387230689|gb|AFJ70001.1|	23	2e-94	353
gi|164665761|gb|ABY66334.1|	23	2e-94	353
gi|164665749|gb|ABY66328.1|	23	2e-94	353
gi|54112063|gb|AAV28722.1|	23	2e-94	353
gi|308742478|gb|ADO39850.1|	22	2e-94	353
gi|336289871|gb|ABY66338.2|	23	2e-94	353
gi|296923485|dbj|BAJ08255.1|	22	2e-94	353
gi|380851119|gb|AFE86002.1|	23	2e-94	353
gi|148533297|gb|ABQ84774.1|	23	2e-94	353
gi|138189|sp|P12650.1|SPIKE_IBVK	23	2e-94	352
gi|211909080|gb|ACJ12834.1|	23	2e-94	352
gi|251748042|gb|ACT10948.1|	22	3e-94	352
gi|239923306|gb|ACS34957.1|	23	3e-94	352
gi|261363539|gb|ACX71846.1|	23	3e-94	352
gi|261363547|gb|ACX71850.1|	23	3e-94	352
gi|251747963|gb|ACT10876.1|	22	3e-94	352
gi|261363537|gb|ACX71845.1|	23	3e-94	352
gi|394397120|gb|ADP06471.2|	23	3e-94	352
gi|21886636|dbj|BAC05493.1|	20	3e-94	352
gi|310696869|gb|ADP06492.1|	21	3e-94	352
gi|99030838|gb|ABF61523.1|	23	4e-94	352
gi|99030781|gb|ABF61473.1|	23	4e-94	352
gi|70799025|gb|AAZ09202.1|	23	4e-94	352
gi|261363529|gb|ACX71841.1|	23	4e-94	352
gi|285803896|gb|ADC35461.1|	22	5e-94	352
gi|261363535|gb|ACX71844.1|	23	5e-94	351
gi|282598596|gb|ADA83567.1|	23	5e-94	351
gi|148533387|gb|ABQ84854.1|	18	5e-94	351
gi|282598563|gb|ADA83537.1|	23	5e-94	351
gi|161213710|gb|ABX60145.1|	20	6e-94	351
gi|99030772|gb|ABF61465.1|	23	6e-94	351
gi|109657775|gb|ABG36779.1|	23	6e-94	351
gi|310696882|gb|ADP06504.1|	23	7e-94	351
gi|99030856|gb|ABF61539.1|	23	7e-94	351
gi|302877224|gb|ADL71486.1|	22	7e-94	351
gi|13492241|gb|AAK28146.1|AF335555_1	23	7e-94	351
gi|262035632|emb|CAZ86699.1|	23	8e-94	351
gi|51814453|gb|AAU09490.1|	23	8e-94	351
gi|33086802|gb|AAP92675.1|	23	8e-94	351
gi|56411794|gb|AAV88470.1|	23	8e-94	351
gi|148533369|gb|ABQ84838.1|	18	8e-94	351
gi|7595817|gb|AAF64463.1|AF239983_1	23	9e-94	351
gi|282598574|gb|ADA83547.1|	23	9e-94	351
gi|402747524|gb|AFQ94213.1|	23	9e-94	350
gi|380710275|gb|AFD98827.1|	27	1e-93	350
gi|308742442|gb|ADO39817.1|	22	1e-93	350
gi|148533413|gb|ABQ84877.1|	23	1e-93	350
gi|261363551|gb|ACX71852.1|	23	1e-93	350
gi|148533440|gb|ABQ84901.1|	18	1e-93	350
gi|353742747|gb|AER08733.1|	23	1e-93	350
gi|298104227|gb|ADI54955.1|	23	1e-93	350
gi|148533458|gb|ABQ84917.1|	23	1e-93	350
gi|302877236|gb|ADL71497.1|	22	1e-93	350
gi|261363549|gb|ACX71851.1|	23	1e-93	350
gi|333797843|gb|AEF98430.1|	18	1e-93	350
gi|388449559|gb|AFK30953.1|	23	1e-93	350
gi|148533333|gb|ABQ84806.1|	18	1e-93	350
gi|261363543|gb|ACX71848.1|	23	2e-93	350
gi|398255453|gb|AFO70497.1|	27	2e-93	350
gi|261363531|gb|ACX71842.1|	23	2e-93	350
gi|148533476|gb|ABQ84933.1|	18	2e-93	350
gi|349582764|gb|AEP84736.1|	23	2e-93	350
gi|353742757|gb|AER08738.1|	23	2e-93	350
gi|93004454|gb|ABE97130.1|	27	2e-93	349
gi|339959572|gb|AEK25521.1|	22	2e-93	349
gi|302877213|gb|ADL71476.1|	22	2e-93	349
gi|93004447|gb|ABE97137.1|	27	2e-93	349
gi|282598497|gb|ADA83477.1|	23	2e-93	349
gi|58958|emb|CAA28431.1|	23	2e-93	349
gi|285803908|gb|ADC35472.1|	22	2e-93	349
gi|57116628|gb|AAW33786.1|	23	2e-93	349
gi|138190|sp|P12651.1|SPIKE_IBVM	23	2e-93	349
gi|387230697|gb|AFJ70005.1|	23	2e-93	349
gi|164665763|gb|ABY66335.1|	23	2e-93	349
gi|375313030|gb|AFA51420.1|	23	3e-93	349
gi|27803884|gb|AAO22155.1|	23	3e-93	349
gi|380710283|gb|AFD98834.1|	27	3e-93	349
gi|45655909|ref|YP_003767.1|	27	3e-93	349
gi|380710249|gb|AFD98806.1|	27	3e-93	349
gi|58884876|gb|AAW83034.1|	23	3e-93	349
gi|148533467|gb|ABQ84925.1|	23	3e-93	349
gi|380710225|gb|AFD98785.1|	27	3e-93	349
gi|402747554|gb|AFQ94240.1|	23	3e-93	349
gi|380710185|gb|AFD98750.1|	27	3e-93	349
gi|319769120|gb|ADV71810.1|	23	3e-93	348
gi|251747975|gb|ACT10887.1|	20	4e-93	348
gi|46369873|gb|AAS89767.1|	27	4e-93	348
gi|341941286|gb|AEL12221.1|	23	4e-93	348
gi|380513817|gb|AFD64748.1|	27	4e-93	348
gi|380710217|gb|AFD98778.1|	27	4e-93	348
gi|237682514|gb|ACR10324.1|	20	4e-93	348
gi|298104216|gb|ADI54945.1|	23	4e-93	348
gi|148533351|gb|ABQ84822.1|	23	4e-93	348
gi|380710267|gb|AFD98820.1|	27	4e-93	348
gi|380710209|gb|AFD98771.1|	27	4e-93	348
gi|158632129|gb|ABW75138.1|	28	4e-93	348
gi|387230691|gb|AFJ70002.1|	23	5e-93	348
gi|353742753|gb|AER08736.1|	23	5e-93	348
gi|164665759|gb|ABY66333.1|	23	5e-93	348
gi|141537147|gb|ABO88151.1|	29	5e-93	348
gi|13377887|gb|AAK20887.1|AF334685_1	23	5e-93	348
gi|148533395|gb|ABQ84861.1|	18	5e-93	348
gi|164665743|gb|ABY66325.1|	23	5e-93	348
gi|327554723|gb|AEB00715.1|	23	6e-93	348
gi|164665745|gb|ABY66326.1|	23	6e-93	348
gi|148533270|gb|ABQ84750.1|	23	6e-93	348
gi|213990628|gb|ACJ60706.1|	27	6e-93	348
gi|380513833|gb|AFD64760.1|	27	7e-93	348
gi|308742466|gb|ADO39839.1|	22	8e-93	347
gi|171988309|gb|ACB59372.1|	23	8e-93	347
gi|402747544|gb|AFQ94231.1|	23	8e-93	347
gi|164665757|gb|ABY66332.1|	23	8e-93	347
gi|41324071|gb|AAS00080.1|	23	8e-93	347
gi|28274446|gb|AAO34396.1|	23	8e-93	347
gi|310696894|gb|ADP06515.1|	23	9e-93	347
gi|251747939|gb|ACT10854.1|	22	9e-93	347
gi|261363541|gb|ACX71847.1|	23	9e-93	347
gi|237682623|gb|ACR10422.1|	20	9e-93	347
gi|164665771|gb|ABY66339.1|	23	9e-93	347
gi|323371212|gb|ADX59451.1|	30	1e-92	347
gi|237682613|gb|ACR10413.1|	20	1e-92	347
gi|148533404|gb|ABQ84869.1|	18	1e-92	347
gi|339506359|gb|AEJ80238.1|	23	1e-92	347
gi|148533279|gb|ABQ84758.1|	23	1e-92	347
gi|289656563|gb|ADD14081.1|	28	1e-92	347
gi|189313870|ref|YP_001941166.1|	28	1e-92	347
gi|148533315|gb|ABQ84790.1|	23	1e-92	347
gi|258676527|gb|ACV87276.1|	28	1e-92	347
gi|260060507|gb|ACX30000.1|	28	1e-92	347
gi|138185|sp|P05135.1|SPIKE_IBV6	23	1e-92	347
gi|197724294|gb|ACH72804.1|	23	1e-92	347
gi|56411792|gb|AAV88469.1|	18	1e-92	347
gi|375313032|gb|AFA51421.1|	23	1e-92	347
gi|289656561|gb|ADD14080.1|	28	1e-92	347
gi|237682474|gb|ACR10288.1|	20	1e-92	347
gi|319769079|gb|ADV71772.1|	23	1e-92	347
gi|73765419|gb|AAZ85066.1|	23	1e-92	347
gi|237682464|gb|ACR10279.1|	20	1e-92	347
gi|289656565|gb|ADD14082.1|	28	2e-92	347
gi|226446310|gb|ACO58540.1|	18	2e-92	347
gi|226446278|gb|ACO58524.1|	18	2e-92	347
gi|8980678|gb|AAF82270.1|AF239273_1	23	2e-92	347
gi|226446320|gb|ACO58545.1|	18	2e-92	346
gi|310696833|gb|ADP06459.1|	23	2e-92	346
gi|386645002|gb|ADD62481.2|	23	2e-92	346
gi|7595821|gb|AAF64465.1|AF239985_1	23	2e-92	346
gi|402747534|gb|AFQ94222.1|	23	2e-92	346
gi|401879818|gb|AFQ31000.1|	23	2e-92	346
gi|148533449|gb|ABQ84909.1|	18	2e-92	346
gi|167843245|gb|ACA03529.1|	23	3e-92	346
gi|353742733|gb|AER08726.1|	23	3e-92	345
gi|148533378|gb|ABQ84846.1|	23	3e-92	345
gi|99030823|gb|ABF61510.1|	23	3e-92	345
gi|138187|sp|P12722.1|SPIKE_IBVD2	23	3e-92	345
gi|148533288|gb|ABQ84766.1|	23	3e-92	345
gi|148533261|gb|ABQ84742.1|	23	3e-92	345
gi|32187079|gb|AAP72149.1|	22	3e-92	345
gi|13377885|gb|AAK20886.1|AF334684_1	23	3e-92	345
gi|158632115|gb|ABW75125.1|	28	4e-92	345
gi|331268079|gb|ACT10927.2|	22	4e-92	345
gi|7542520|gb|AAF63482.1|AF239270_1	23	4e-92	345
gi|148533324|gb|ABQ84798.1|	23	4e-92	345
gi|339959561|gb|AEK25511.1|	20	4e-92	345
gi|8980684|gb|AAF82273.1|AF239276_1	23	4e-92	345
gi|13492239|gb|AAK28145.1|AF335554_1	23	5e-92	345
gi|148533431|gb|ABQ84893.1|	23	5e-92	345
gi|806410|gb|AAC54067.1|	23	5e-92	345
gi|12585455|gb|AAF82279.2|AF239282_1	23	5e-92	345
gi|237682484|gb|ACR10297.1|	20	6e-92	345
gi|237682504|gb|ACR10315.1|	20	6e-92	345
gi|148533422|gb|ABQ84885.1|	18	6e-92	345
gi|62911130|gb|AAY21246.1|	23	7e-92	344
gi|112949618|gb|ABI26423.1|	23	7e-92	344
gi|8980674|gb|AAF82268.1|AF239271_1	18	7e-92	344
gi|260060509|gb|ACX30001.1|	28	7e-92	344
gi|219523385|gb|ACL14817.1|	18	7e-92	344
gi|62911124|gb|AAY21243.1|	23	8e-92	344
gi|260060511|gb|ACX30002.1|	28	8e-92	344
gi|289656567|gb|ADD14083.1|	28	9e-92	344
gi|302877190|gb|ADL71455.1|	22	9e-92	344
gi|258676503|gb|ACV87254.1|	28	1e-91	344
gi|148533360|gb|ABQ84830.1|	23	1e-91	344
gi|62911134|gb|AAY21248.1|	23	1e-91	344
gi|347361084|gb|AEO86768.1|	23	1e-91	344
gi|62911128|gb|AAY21245.1|	23	1e-91	344
gi|56411796|gb|AAV88471.1|	23	1e-91	343
gi|11038442|gb|AAF99709.2|AF288146_1	23	1e-91	343
gi|226201164|gb|ACO37574.1|	23	1e-91	343
gi|62996631|gb|AAY24423.1|	23	1e-91	343
gi|222137334|gb|ACM45229.1|	23	2e-91	343
gi|62911132|gb|AAY21247.1|	23	2e-91	343
gi|62911122|gb|AAY21242.1|	23	2e-91	343
gi|62911126|gb|AAY21244.1|	23	2e-91	343
gi|319769133|gb|ADV71822.1|	23	2e-91	343
gi|251748066|gb|ACT10970.1|	20	2e-91	343
gi|7595819|gb|AAF64464.1|AF239984_1	23	2e-91	343
gi|7542518|gb|AAF63481.1|AF239269_1	23	2e-91	343
gi|282598541|gb|ADA83517.1|	23	3e-91	342
gi|288966027|gb|ADC79651.1|	23	3e-91	342
gi|282598530|gb|ADA83507.1|	23	3e-91	342
gi|353742723|gb|AER08721.1|	23	3e-91	342
gi|282598511|gb|ADA83490.1|	23	3e-91	342
gi|282598519|gb|ADA83497.1|	23	3e-91	342
gi|12585342|gb|AAF82271.2|AF239274_1	23	3e-91	342
gi|773177|gb|AAC42112.1|	23	3e-91	342
gi|282598486|gb|ADA83467.1|	23	3e-91	342
gi|32187083|gb|AAP72150.1|	22	3e-91	342
gi|7595815|gb|AAF64462.1|AF239982_1	23	3e-91	342
gi|112253726|gb|ABI14448.1|	20	4e-91	342
gi|8980682|gb|AAF82272.1|AF239275_1	23	4e-91	342
gi|319769066|gb|ADV71760.1|	23	4e-91	342
gi|353742739|gb|AER08729.1|	23	4e-91	342
gi|12408749|gb|AAF82277.2|AF239280_1	23	4e-91	342
gi|261363545|gb|ACX71849.1|	23	5e-91	342
gi|167843241|gb|ACA03527.1|	23	5e-91	342
gi|56555215|gb|AAV98206.1|	23	5e-91	342
gi|167843253|gb|ACA03533.1|	23	5e-91	342
gi|226446314|gb|ACO58542.1|	18	5e-91	341
gi|401879829|gb|AFQ31010.1|	23	6e-91	341
gi|226446312|gb|ACO58541.1|	18	6e-91	341
gi|4972612|gb|AAD34713.1|AF094816_1	18	6e-91	341
gi|8980676|gb|AAF82269.1|AF239272_1	18	6e-91	341
gi|9626538|ref|NP_040831.1|	23	6e-91	341
gi|167843243|gb|ACA03528.1|	23	6e-91	341
gi|282598585|gb|ADA83557.1|	23	7e-91	341
gi|167843249|gb|ACA03531.1|	23	7e-91	341
gi|302877202|gb|ADL71466.1|	22	7e-91	341
gi|353742729|gb|AER08724.1|	23	8e-91	341
gi|353742727|gb|AER08723.1|	23	9e-91	340
gi|251747996|gb|ACT10906.1|	22	1e-90	340
gi|110826443|gb|ABH01142.1|	23	1e-90	340
gi|110006349|gb|ABG48666.1|	23	1e-90	340
gi|258676515|gb|ACV87265.1|	28	1e-90	340
gi|4972614|gb|AAD34715.1|AF094818_1	23	1e-90	340
gi|4972615|gb|AAD34716.1|AF094819_1	23	1e-90	340
gi|282598552|gb|ADA83527.1|	23	2e-90	340
gi|13492237|gb|AAK28144.1|AF335553_1	23	2e-90	340
gi|58989|emb|CAA41067.1|	18	2e-90	340
gi|15011416|gb|AAK77543.1|AF394180_1	23	2e-90	340
gi|336326734|gb|ABE68839.3|	23	3e-90	339
gi|82780491|gb|ABB90525.1|	19	3e-90	339
gi|4972610|gb|AAD34711.1|AF094814_1	18	3e-90	339
gi|8980690|gb|AAF82276.1|AF239279_1	23	3e-90	339
gi|302877180|gb|ADL71446.1|	20	5e-90	338
gi|167843251|gb|ACA03532.1|	23	7e-90	338
gi|14253130|emb|CAC39300.1|	23	7e-90	338
gi|353742735|gb|AER08727.1|	23	8e-90	337
gi|308742454|gb|ADO39828.1|	22	9e-90	337
gi|4972613|gb|AAD34714.1|AF094817_1	18	1e-89	337
gi|21886634|dbj|BAC05492.1|	20	1e-89	337
gi|167843247|gb|ACA03530.1|	23	2e-89	337
gi|353742731|gb|AER08725.1|	23	2e-89	336
gi|167843255|gb|ACA03534.1|	23	3e-89	335
gi|353742737|gb|AER08728.1|	23	1e-88	334
gi|13377889|gb|AAK20888.1|AF334686_1	23	1e-88	333
gi|31088354|gb|AAO39134.1|	22	1e-88	333
gi|237682573|gb|ACR10377.1|	22	2e-88	333
gi|237682583|gb|ACR10386.1|	22	3e-88	332
gi|33519248|gb|AAQ20921.1|	28	4e-88	332
gi|319769038|gb|ADV71734.1|	23	1e-87	330
gi|353742725|gb|AER08722.1|	23	2e-87	330
gi|33519250|gb|AAQ20922.1|	28	3e-87	329
gi|353742759|gb|AER08739.1|	23	8e-87	328
gi|99030865|gb|ABF61547.1|	23	3e-86	326
gi|1906322|emb|CAA71146.1|	19	3e-86	325
gi|319769106|gb|ADV71797.1|	23	2e-85	323
gi|1869755|emb|CAA71056.1|	19	5e-85	322
gi|13448686|gb|AAK27164.1|	23	9e-85	321
gi|219523383|gb|ACL14816.1|	23	9e-85	321
gi|1906323|emb|CAA71147.1|	19	1e-84	321
gi|99030847|gb|ABF61531.1|	23	4e-84	318
gi|81097509|gb|ABB55446.1|	23	5e-84	318
gi|81097507|gb|ABB55445.1|	23	2e-83	317
gi|353742761|gb|AER08740.1|	23	3e-81	309
gi|13448692|gb|AAK27167.1|	23	2e-80	306
gi|353742743|gb|AER08731.1|	23	4e-78	299
gi|353742741|gb|AER08730.1|	23	4e-78	299
gi|81097511|gb|ABB55447.1|	23	1e-76	294
gi|340366983|gb|AEK31974.1|	28	1e-76	294
gi|197260970|gb|ACH56962.1|	13	1e-75	290
gi|340366987|gb|AEK31976.1|	28	5e-75	288
gi|340366985|gb|AEK31975.1|	28	5e-75	288
gi|340367003|gb|AEK31984.1|	28	6e-72	278
gi|164665755|gb|ABY66331.1|	23	1e-51	211
gi|164665751|gb|ABY66329.1|	23	2e-49	203
gi|164665753|gb|ABY66330.1|	23	4e-49	202
gi|94471593|gb|ABF21064.1|	13	2e-19	103
gi|94471587|gb|ABF21061.1|	13	1e-18	101
gi|88595864|gb|ABD43175.1|	13	4e-18	99.8
gi|88595872|gb|ABD43179.1|	13	7e-18	99
gi|388557438|dbj|BAM16459.1|	13	3e-17	96.7
gi|388557446|dbj|BAM16463.1|	13	4e-17	96.3
gi|388557440|dbj|BAM16460.1|	13	4e-17	96.3
gi|12484401|gb|AAA61557.2|	13	6e-17	95.9
gi|12619813|gb|AAG60545.1|	13	1e-16	95.1
gi|388557430|dbj|BAM16455.1|	13	1e-16	95.1
gi|88595876|gb|ABD43181.1|	13	1e-16	94.7
gi|88595868|gb|ABD43177.1|	13	1e-16	94.7
gi|88595874|gb|ABD43180.1|	13	1e-16	94.7
gi|12658223|gb|AAK01071.1|AAK01071	13	2e-16	94
gi|11870039|gb|AAG40595.1|	13	3e-16	93.6
gi|88595870|gb|ABD43178.1|	13	4e-16	93.2
gi|88595878|gb|ABD43182.1|	13	4e-16	93.2
gi|84310309|gb|ABC55312.1|	13	5e-16	92.8
gi|12330252|gb|AAG52663.1|AF181469_1	13	5e-16	92.8
gi|88595866|gb|ABD43176.1|	13	5e-16	92.8
gi|88595880|gb|ABD43183.1|	13	6e-16	92.4
gi|84310313|gb|ABC55314.1|	13	1e-15	91.7
gi|11875399|gb|AAG40623.1|	13	1e-15	91.7
gi|84310311|gb|ABC55313.1|	13	1e-15	91.7
gi|13173413|gb|AAK14398.1|AF339836_2	13	1e-15	91.3
gi|11870049|gb|AAG40601.1|	13	2e-15	90.9
gi|11321426|gb|AAG34163.1|	13	5e-06	59.7
