# Supplementary material for: Novel mutations identified from whole-genome sequencing of SARS-CoV-2 isolated from Noakhali, Bangladesh
Source: Research Square preprint supplement (doi:10.21203/rs.3.rs-437228/v1), 2021-04-30
Supplement: Supplementary file 7 [file 3fb4495f5348afdc82252f37.xlsx]

## Sheet: Sheet1
Supplementary Table S4: Patient metadata of SARS-CoV-2 samples isolated from Noakhali, Bangladesh.
	NSTU ID	Well no	Ct Value			RNA Quantity		Age	Sex	Upazila	Sample Collection Date	Status	Disease Severity	Blood Group	Height	Weight	Contact With Positive Patients	Travel History	Physical Exercise	Smoker	Meditation
NGRI ID			FAM (ORF 1ab)	ROX (N gene)	Cy5 (RnasP)	RNA Conc. (ng/µl)	RNA Ratio (260/280)
NGRI-R1-NSTU-2	2	2	17.13	18.23	20.45	17.5	1.87	58	Male	Noakhali Sadar Upazila	07-07-2020	Isolation Center	Moderate	O+	5'6"	60
NGRI-R1-NSTU-3	3	3	20.95	19.41	19.83	15.16	1.97	29	Male	Chasirhat, SonaimuriUpazila, Noakhali	04-07-2020	Home Death 06.07.20	Death	AB+	5'6"	75	Yes	Yes		Yes
NGRI-R1-NSTU-5	5	5	18.37	18.23	20.19	8.14	1.95	35	Female	Companiganj NK Upazila	09-07-2020	Isolation Center	Asymptomatic	A+	5'6"	72
NGRI-R1-NSTU-6	6	6	22.05	22.31	23.23	6.99	0.73	45	Male	Noakhali Sadar Upazila	11-07-2020	Home Quarentine	Moderate	A+	5'5"	60
NGRI-R1-NSTU-16	16	15	16.49	17.32	20.35	3.18	2.19	35	Male	Hatiya Upazila	11-07-2020	Home Quarentine	Moderate	A+	5'7"	62				Yes
NGRI-R1-NSTU-18	18	18	21.41	20.32	21.93	2	1.92	65	Male	Mollah Bari, Chatkhil, Noakhali.	07-07-2020	Home Death 07.07.20	Death	O+	5'6"	65	Yes
NGRI-R1-NSTU-21	21	21	19.79	23.43	25.73	9.57	5.44	31	Male	Lakshmipur Sadar Upazilla	13-07-2020	Home Quarentine	Asymptomatic	AB+	5'6"	60
NGRI-R1-NSTU-31	31	31	22.89	21.12	20.98	2.16	2.48	32	Male	Subarna Char Upazila	12-07-2020	Home Quarentine	Moderate	A+	5'	76
NGRI-R2-1	1	1	17.53	16.45	24.83	150.91	1.97	45	Male	Hatiya Upazila	26-09-2020	Isolation Center	Asymptomatic	O+	5'5"	65
NGRI-R2-4	4	4	19.58	17.91	25.03	142.23	1.79	34	Male	Begumganj Upazila	28-07-2020	ICU	Severe	AB+	5'6"	90	Yes			Yes
NGRI-R2-8	8	8	15.43	16.32	18.21	7.89	1.9	65	Male	Kabirhat, Noakhali	11-08-2020	Death (Mugda Medical College Hospital Death 14.08.20)	Death	B+	5'8"	70	Yes	Yes		Yes
NGRI-R2-11	11	11	19.29	17.23	25.6	71.19	1.8	30	Male	Lakshmipur Sadar Upazilla	26-07-2020	Hospitalized	Severe	A+	5'6"	60	Yes	Yes
NGRI-R2-17	17	17	22.72	21.07	25.22	162.25	1.92	70	Male	Kabirhat, Noakhali	25-07-2020	Death COVID19 Dedicated Hoapital, Shahid Vulu Stadium 17.08.20	Death	A+	5'6"	75				Yes
NGRI-R2-18	18	18	22.24	20.59	28.35	159.03	1.84	20	Female	Subarna Char Upazila	26-07-2020	Home Quarentine	Severe	A+	5'6"	72	Yes
NGRI-R2-20	20	20	22.45	20.16	25.25	163.45	1.81	24	Male	Hatiya Upazila	15-07-2020	Home Quarentine	Moderate	B+	5'5"	60
NGRI-R2-22	22	22	17.84	15.93	25.21	168.63	1.82	4	Male	Subarna Char Upazila	19-07-2020	Home Quarentine	Severe	B+	5'7"	62	Yes
NGRI-R2-24	24	24	21.12	19.31	28.48	8.96	1.91	31	Female	Sadar Upazilla Lakshmipur	10-09-2020	Home Quarentine	Asymptomatic	A+	5'5"	60
NGRI-R2-25	25	25	18.66	17.08	26.7	150.85	1.8	21	Male	Noakhali Sadar Upazila	20-07-2020	Isolation Center	Moderate	O+	5'6"	65
NGRI-R2-26	26	26	19.34	17.5	25.78	7.6	1.91	30	Female	Companiganj NK Upazila	09-09-2020	Isolation Center	Asymptomatic	AB+	5'7"	85
NGRI-R2-27	27	27	19.51	17.36	24.14	171.74	1.93	58	Male	Noakhali Sadar Upazila	20-07-2020	Isolation Center	Asymptomatic	AB+	5'6"	60
NGRI-R2-O7	7	7	21.11	19.64	26.95	6.67	1.85	18	Female	Companiganj NK Upazila	11-08-2020	Isolation Center	Moderate	A+	4'5"	62
NGRI-R2-O9	9	9	20.65	18.39	24.86	7.5	1.88	26	Female	Companiganj NK Upazila	11-08-2020	Isolation Center	Asymptomatic	B+	5'6"	66
NGRI-R2-O10	10	10	18.41	16.59	26.86	5.6	1.88	20	Male	Noakhali Sadar Upazila	13-08-2020	Hospitalized	Severe	B+	5'5"	66	Yes
NGRI-R2-O25	25	25	16.12	14.29	24.86	15.78	1.9	15	Male	Kabirhat Upazila	10-09-2020	Isolation Center	Moderate	B+	5'6"	57			Yes
NGRI-R3-2	2	2	22.46	20.34	27.19	102.42	1.95	34	Female	Lakshmipur (sadar) Upazila Health Office	19-07-2020	Hospitalized	Severe	O+	5'5"	60	Yes	Yes
NGRI-R3-3	3	3	23.96	21.41	27.04	152.71	1.94	18	Female	Lakshmipur (sadar) Upazila Health Office	19-07-2020	Isolation Center	Moderate	B+	5'6"	65
NGRI-R3-5	5	5	20.83	19.63	26.14	111.8	1.78	40	Female	Lakshmipur (sadar) Upazila Health Office	19-07-2020	Home Quarentine	Asymptomatic	A+	5'8"	70
NGRI-R3-6	6	6	20.6	18.65	25.89	98.89	2.31	35	Female	Lakshmipur (sadar) Upazila Health Office	19-07-2020	Isolation Center	Moderate	O+	5'3"	52		Yes
NGRI-R3-7	7	7	26.72	25.29	27.46	74.17	1.79	40	Female	Lakshmipur (sadar) Upazila Health Office	19-07-2020	Isolation Center	Asymptomatic	AB+	5'7"	62
NGRI-R3-9	9	9	19.54	17.01	26.64	83.6	1.59	35	Male	Companiganj Upazila Health Complex	18-07-2020	Isolation Center	Asymptomatic	A+	5'6"	66
NGRI-R3-10	10	10	18.85	17.25	25.4	91.99	1.85	52	Male	Companiganj Upazila Health Complex	18-07-2020	Isolation Center	Moderate	A+	5'5"	66				Yes
NGRI-R3-11	11	11	23.02	21.46	25.47	159.87	1.99	52	Female	Raipur Upazila Health Complex	18-07-2020	ICU	Severe	O+	5'3"	52	Yes
NGRI-R3-12	12	12	29.04	26.41	26.56	95.87	1.95	31	Male	Raipur Upazila Health Complex	18-07-2020	Home Quarentine	Asymptomatic	AB+	5'5"	60		Yes
NGRI-R3-14	14	14	19.53	18.05	24.26	165.97	1.92	69	Male	Lakshmipur District Hospital	23-10-2020	Home Quarentine	Moderate	O+	5'5"	63
NGRI-R3-15	15	15	20.72	19.13	26.05	162.24	1.82	30	Male	Lakshmipur District Hospital	24-10-2020	Home Quarentine	Asymptomatic	AB+	5'6"	57
NGRI-R3-16	16	16	19.36	17.8	24.3	159.03	1.84	Not Given	Male	Lakshmipur District Hospital	25-10-2020	Home Quarentine	Asymptomatic	B+	5'6"	60
NGRI-R3-17	17	17	21.33	19.28	26.43	156.36	1.95	22	Male	Lakshmipur District Hospital	26-10-2020	Hospitalized	Severe	A+	5'7"	85	Yes			Yes
NGRI-R3-O1	1	1	20.04	17.48	25.26	5.96	1.87	34	Male	Hatiya Upazila	11-08-2020	Isolation Center	Asymptomatic	AB+	5'6"	65			Yes		Yes
NGRI-R3-O5	5	5	22.67	20.61	29.23	5.76	1.89	38	Male	Kabirhat Upazila	12-08-2020	Home Quarentine	Moderate	A+	5'3"	52			Yes
NGRI-R3-O6	6	6	19.61	17.72	26.15	7.65	1.91	58	Male	Companiganj NK Upazila	11-08-2020	Home Quarentine	Asymptomatic	A+	5'7"	62			Yes
NGRI-R3-O11	11	11	20.53	18.51	26.72	2.23	1.91	20	Male	Noakhali Sadar Upazila	13-08-2020	Hospitalized	Moderate	O+	5'3"	52
NGRI-R3-O15	15	15	18.26	16.27	24.24	14.76	1.93	30	Male	Lakshmipur Sadar Upazilla	12-08-2020	Isolation Center	Severe	AB+	5'5"	60	Yes
NGRI-R4-1	1	1	23.19	23.88	24.12	145.43	1.97	39	Male	Noakhali District Hospital, Noakhali	15-11-2020	Isolation Center	Moderate	B+	5'7"	62
NGRI-R4-2	2	2	25.86	21.56	27.36	137.17	1.75	35	Female	Lakshmipur District Hospital	16-11-2020	Home Quarentine	Asymptomatic	A+	5'6"	65
NGRI-R4-3	3	3	25.2	21.21	28.02	167.8	1.95	55	Female	Raipur Upazila Health Complex	19-11-2020	Isolation Center	Moderate	B+	5'6"	60
NGRI-R4-6	4	4	25.99	21.71	27.9	132.53	1.88	47	Male	Lakshmipur District Hospital	16-11-2020	Home Quarentine	Moderate	A+	5'	76				Yes
NGRI-R4-O17	17	17	16.33	14.67	26.07	8.93	1.95	36	Male	Noakhali Sadar Upazila	12-08-2020	Isolation Center	Severe	B+	5'1"	60	Yes			Yes
NGRI-R4-O24	24	24	21.12	19.31	28.48	8.96	1.91	31	Female	Sadar Upazilla Lakshmipurr	10-09-2020	Isolation Center	Asymptomatic	O+	5'5"	63
NGRI-R4-O27	27	27	21.72	18.49	25.24	14.87	1.89	70	Male	Kabirhat Upazila	18-07-2020	Somrita Hospital, Dhaka, Death 21.7.2020	Death	A+	5'6"	60	Yes	Yes
NGRI-R4-OR18	18	18	24	22.11	28.38	119.53	1.82	Not Given	Male	Lakshmipur District Hospital	27-10-2020	Hospitalized	Moderate	A+	5'7"	63
NGRI-R4-OR19	19	19	18.1	16.86	25.5	147.86	1.85	Not Given	Male	Lakshmipur District Hospital	28-10-2020	Home Quarentine	Asymptomatic	A+	5'5"	65					Yes
NGRI-R4-OR20	20	20	20.52	19.17	26.21	93.47	1.61	32	Male	Noakhali District Hospital, Noakhali	29-10-2020	ICU	Severe	B+	5'6"	90
NGRI-R4-OR21	21	21	23.69	22.49	27.35	86	2	32	Male	Noakhali District Hospital, Noakhali	30-10-2020	Home Quarentine	Asymptomatic	B+	5'7"	72
NGRI-R4-OR22	22	22	24.01	22.72	27.81	91.7	2.61	33	Male	Subarnachar Upazila Health Complex	31-10-2020	Hospitalized	Severe	O+	5'6"	60	Yes			Yes
NGRI-R4-OR23	23	23	16.84	14.39	24.55	148.67	2.22	35	Male	Subarnachar Upazila Health Complex	01-11-2020	Hospitalized	Moderate	AB+	5'6"	75			Yes
NGRI-R4-OR24	24	24	27.47	26.07	28.32	90.86	1.8	27	Male	Companiganj Upazila Health Complex	02-11-2020	Hospitalized	Severe	B+	5'6"	72	Yes
								125	REZA
								195	TRA
								F
								F
