# Supplementary material for: Novel mutations identified from whole-genome sequencing of SARS-CoV-2 isolated from Noakhali, Bangladesh
Source: Research Square preprint supplement (doi:10.21203/rs.3.rs-437228/v1), 2021-04-30
Supplement: Supplementary file 8 [file d324f5a5bf0b1254401098a5.xlsx]

## Sheet: Sheet1
						Supplementary Table S5: Disease history of patients from where SARS-CoV-2 strains were isolated.
	Signs & Symptoms																						Others Signs & Symptoms								Co-existing Disorder
NGRI-ID	History of fever ≥ 38.5°C	Dry cough	Cough with sputum	Cough with haemoptysis	Sore throat	Rhinorrhoea	Wheezing	Chest pain	Myalgia	Arthralgia	Malaise	Shortness of breath	Inability to walk	Lower chest wall indrawing	Headache	Altered consciousness/ Confusion	Seizures	Abdominal pain	Vomiting/Nausea	Diarrhoea	Lymphadenopathy	Intracerebral haemorrhage	Hemiparesis	Ageusia/Anosmia	Urinary tract infection	Constipation	Oedema/Decreased urine output	Dizziness	Insomonia	Palpitations	Chronic cardiac disease (not Hypertension)	Hypertension	Chronic pulmonary disease	Asthma	Chronic renal disease	Chronic hepatic disease	Chronic neurological disorder	Diabetes mellitus	Immunodeficiency
NGRI-R1-NSTU-2	Yes		Yes		Yes		Yes		Yes		Yes		Yes	Yes	Yes			Yes		Yes									Yes
NGRI-R1-NSTU-3	Yes			Yes	Yes		Yes	Yes			Yes	Yes	Yes		Yes		Yes		Yes	Yes			Yes		Yes		Yes	Yes			Yes
NGRI-R1-NSTU-5		Yes			Yes					Yes	Yes					Yes	Yes	Yes				Yes		Yes		Yes						Yes	Yes	Yes
NGRI-R1-NSTU-6		Yes		Yes		Yes		Yes			Yes	Yes			Yes		Yes		Yes	Yes	Yes
NGRI-R1-NSTU-16	Yes		Yes		Yes		Yes		Yes	Yes	Yes		Yes	Yes		Yes						Yes						Yes
NGRI-R1-NSTU-18	Yes			Yes	Yes		Yes	Yes			Yes	Yes	Yes		Yes		Yes		Yes	Yes											Yes				Yes	Yes
NGRI-R1-NSTU-21	Yes		Yes			Yes			Yes	Yes								Yes		Yes			Yes			Yes					Yes
NGRI-R1-NSTU-31		Yes					Yes	Yes	Yes		Yes		Yes		Yes			Yes	Yes					Yes
NGRI-R2-1	Yes						Yes				Yes								Yes								Yes					Yes
NGRI-R2-4	Yes	Yes		Yes		Yes		Yes	Yes		Yes	Yes	Yes	Yes		Yes		Yes	Yes	Yes	Yes	Yes		Yes					Yes				Yes					Yes
NGRI-R2-8	Yes	Yes		Yes	Yes		Yes	Yes			Yes	Yes	Yes	Yes	Yes		Yes		Yes	Yes
NGRI-R2-11	Yes		Yes		Yes		Yes			Yes			Yes		Yes		Yes		Yes	Yes		Yes			Yes							Yes
NGRI-R2-17	Yes	Yes		Yes	Yes		Yes	Yes			Yes	Yes	Yes	Yes	Yes		Yes		Yes	Yes															Yes	Yes
NGRI-R2-18		Yes		Yes		Yes			Yes			Yes		Yes		Yes		Yes		Yes	Yes		Yes					Yes
NGRI-R2-20	Yes	Yes				Yes	Yes	Yes		Yes	Yes	Yes		Yes				Yes									Yes				Yes	Yes
NGRI-R2-22	Yes		Yes		Yes		Yes		Yes		Yes		Yes		Yes		Yes			Yes		Yes		Yes						Yes	Yes		Yes				Yes
NGRI-R2-25		Yes		Yes	Yes		Yes		Yes		Yes		Yes		Yes				Yes
NGRI-R2-26					Yes				Yes		Yes	Yes				Yes		Yes				Yes
NGRI-R2-27	Yes		Yes		Yes					Yes	Yes				Yes			Yes		Yes
NGRI-R2-O7		Yes			Yes		Yes	Yes				Yes				Yes					Yes									Yes	Yes			Yes
NGRI-R2-O9		Yes		Yes			Yes		Yes		Yes	Yes			Yes	Yes	Yes							Yes													Yes
NGRI-R2-O10	Yes	Yes		Yes	Yes			Yes		Yes	Yes	Yes	Yes		Yes	Yes		Yes	Yes	Yes		Yes	Yes				Yes		Yes			Yes
NGRI-R2-O25		Yes	Yes	Yes			Yes			Yes	Yes			Yes		Yes		Yes	Yes		Yes			Yes		Yes						Yes	Yes
NGRI-R3-2	Yes		Yes	Yes		Yes		Yes		Yes	Yes	Yes		Yes			Yes	Yes	Yes	Yes	Yes				Yes		Yes			Yes		Yes	Yes		Yes
NGRI-R3-3	Yes		Yes			Yes	Yes				Yes	Yes				Yes		Yes	Yes												Yes	Yes				Yes
NGRI-R3-5		Yes									Yes			Yes	Yes		Yes				Yes
NGRI-R3-6					Yes		Yes	Yes	Yes					Yes			Yes			Yes					Yes								Yes
NGRI-R3-7				Yes		Yes		Yes				Yes			Yes				Yes									Yes
NGRI-R3-9			Yes		Yes													Yes
NGRI-R3-10	Yes		Yes	Yes		Yes				Yes	Yes	Yes	Yes		Yes					Yes												Yes
NGRI-R3-11		Yes		Yes				Yes			Yes		Yes		Yes		Yes		Yes			Yes	Yes			Yes			Yes	Yes	Yes
NGRI-R3-12	Yes	Yes					Yes		Yes						Yes		Yes		Yes
NGRI-R3-14	Yes	Yes			Yes		Yes			Yes	Yes						Yes	Yes
NGRI-R3-15		Yes		Yes	Yes					Yes		Yes		Yes						Yes
NGRI-R3-16	Yes						Yes				Yes				Yes		Yes		Yes		Yes
NGRI-R3-17	Yes	Yes		Yes	Yes		Yes		Yes			Yes		Yes	Yes	Yes			Yes	Yes			Yes		Yes			Yes			Yes
NGRI-R3-O1							Yes	Yes			Yes				Yes				Yes		Yes													Yes
NGRI-R3-O5	Yes		Yes			Yes				Yes	Yes			Yes	Yes		Yes		Yes	Yes			Yes
NGRI-R3-O6	Yes		Yes		Yes						Yes		Yes		Yes			Yes							Yes						Yes	Yes
NGRI-R3-O11	Yes	Yes		Yes		Yes			Yes		Yes	Yes	Yes		Yes		Yes	Yes	Yes	Yes
NGRI-R3-O15		Yes	Yes		Yes		Yes		Yes		Yes	Yes		Yes		Yes			Yes	Yes	Yes	Yes		Yes
NGRI-R4-1	Yes							Yes		Yes	Yes	Yes			Yes
NGRI-R4-2		Yes			Yes						Yes	Yes								Yes
NGRI-R4-3				Yes			Yes				Yes			Yes		Yes					Yes
NGRI-R4-6	Yes		Yes		Yes	Yes			Yes	Yes			Yes		Yes		Yes	Yes		Yes										Yes						Yes		Yes
NGRI-R4-O17	Yes	Yes		Yes		Yes		Yes		Yes	Yes		Yes		Yes		Yes	Yes		Yes							Yes			Yes				Yes	Yes				Yes
NGRI-R4-O24		Yes	Yes		Yes			Yes		Yes	Yes							Yes		Yes					Yes						Yes					Yes
NGRI-R4-O27	Yes	Yes		Yes	Yes		Yes	Yes			Yes	Yes	Yes	Yes	Yes		Yes		Yes	Yes													Yes
NGRI-R4-OR18	Yes		Yes				Yes	Yes			Yes	Yes	Yes				Yes	Yes																		Yes
NGRI-R4-OR19	Yes		Yes			Yes		Yes			Yes				Yes					Yes										Yes
NGRI-R4-OR20	Yes		Yes	Yes		Yes		Yes	Yes		Yes	Yes			Yes			Yes		Yes	Yes	Yes									Yes
NGRI-R4-OR21		Yes				Yes		Yes			Yes		Yes									Yes																Yes
NGRI-R4-OR22	Yes	Yes			Yes			Yes		Yes	Yes		Yes			Yes			Yes		Yes									Yes
NGRI-R4-OR23		Yes				Yes			Yes					Yes			Yes		Yes	Yes
NGRI-R4-OR24	Yes	Yes	Yes	Yes			Yes			Yes	Yes	Yes		Yes		Yes		Yes		Yes	Yes	Yes			Yes				Yes		Yes								Yes
